# Supplementary material
Source: publisher figshare collection journal article supplement (https://acs.figshare.com/ndownloader/files/26406565)
Supplement: Supplementary file 1 [file 26406565]

# Supporting Information

## Hydrogen Peroxide Generation with 100% Faradaic Efficiency on Metal-Free Carbon Black

*Zhe Wang,<sup>†</sup> Qin-Kun Li,<sup>‡</sup> Chenhao Zhang,<sup>†</sup> Zhihua Cheng,<sup>†</sup> Weiyin Chen,<sup>†</sup> Emily A. McHugh,<sup>†</sup>*

*Robert A. Carter,<sup>†</sup> Boris I. Yakobson,<sup>‡, §\*</sup> and James M. Tour<sup>†, ‡, §\*</sup>*

*<sup>†</sup>Department of Chemistry, <sup>‡</sup>Department of Materials Science and NanoEngineering,*

*<sup>§</sup>Smalley-Curl Institute, NanoCarbon Center and the Welch Institute for Advanced Materials,*

*Rice University, 6100 Main Street, Houston, TX 77005, USA*

E-mail: [biy@rice.edu](mailto:biy@rice.edu) (Boris Yakobson), [tour@rice.edu](mailto:tour@rice.edu) (James Tour)

### Experimental/Methods

#### Electrochemically active surface area (ECSA)

ECSA is calculated from the electrochemical double-layer capacitance ( $C_{dl}$ ) of the catalyst.<sup>1</sup>  $C_{dl}$  was determined from the slope by plotting current density as a function of scan rate in a potential range where no Faradaic current was generated. The results were shown in Figure S11 and Table S5. The ECSA was calculated from the following equation:

$$ECSA = \frac{C_{dl}}{C_s}$$

where  $C_s$  is the specific capacitance of a flat standard electrode with 1 cm<sup>2</sup> of real surface area. The value of  $C_s$  is determined to be 40 μF cm<sup>-2</sup> according to several previous studies.<sup>1,2</sup> The calculated results are listed in Table S5.

## Calibration of reference electrodes

The HgO/Hg (1 M KOH) and AgCl/Ag (saturated KCl) reference electrodes used were both calibrated with respect to the reversible hydrogen electrode (RHE).

$$E(\text{RHE}) = E(\text{HgO/Hg}) + 0.900 \text{ V}$$

$$E(\text{RHE}) = E(\text{AgCl/Ag}) + 0.970 \text{ V}$$

## Koutecky-Levich plot

The O<sub>2</sub> reduction current satisfies Koutecky-Levich (K-L) equation,

$$J^{-1} = J_K^{-1} + J_L^{-1}$$

where J<sub>K</sub> is the potential dependent kinetic current and J<sub>L</sub> is the Levich current,

$$J_L = 0.62nF[\text{O}_2](D_{\text{O}_2})^{2/3}\omega^{1/2}\nu^{-1/6}$$

where n is the electron transfer number, [O<sub>2</sub>] is the concentration of O<sub>2</sub> in a saturated solution (1.26 mol m<sup>-3</sup>) at 25 °C, D<sub>O<sub>2</sub></sub> is the diffusion coefficient of O<sub>2</sub> (1.93×10<sup>-5</sup> cm<sup>2</sup> s<sup>-1</sup>), ω is the angular velocity of the disc and ν is the kinematic viscosity of the solution (0.01 cm<sup>2</sup> s<sup>-1</sup>) at 25 °C.<sup>3</sup>

*Preparation of CB-UV:* A thin layer of commercial CB (black pearl 2000, Cabot) was scattered uniformly onto a microscope glass slide, which was then transferred into a UV-ozone cleaner (Boekel Model 135500) and treated in the ozone environment for 1 h.

*Preparation of CB-Plasma:* A thin layer of commercial CB (black pearl 2000, Cabot) was uniformly scattered onto a microscope glass slide, which was placed in a home-made boat and transferred into a plasma cleaner (Model 1020, Fischione Instruments) and treated with plasma under 20% O<sub>2</sub>/Ar atmosphere.

*Preparation of CB-A:* CB-Plasma powders were scattered in a boat, which was then transferred into a quartz tube and heated to 750 °C with a heating rate of 10 °C min<sup>-1</sup> and maintained at 750 °C for 2 h under 150 sccm Ar flow.

*Characterization:* TEM, scanning TEM (STEM) and energy-dispersive spectroscopy (EDS) images were acquired on a JEOL-2100F field emission gun transmission electron microscope at 200 kV acceleration voltage. X-ray photoelectron spectroscopies (XPS) of the samples were investigated on a PHI Quantera scanning X-ray microprobe at  $4 \times 10^{-9}$  Torr. Elemental spectra were shifted by calibrating the obtained C1s peaks to 284.6 eV. XRD patterns were collected on a Rigaku D/Max Ultima II (Rigaku Corporation), which is equipped with a Cu K $\alpha$  radiation, a graphite monochromator, and a scintillation counter. Raman spectra were obtained on a Renishaw Raman microscope with a 532 nm laser. The BET characterizations were done on a Quantachrome Autosorb-iQ3-MP/Kr BET surface analyzer. UV-Vis spectra were performed on a SHIMADZU UV-3600Plus configured with a photomultiplier tube from 200 to 400 nm wavelength. ICP-MS trace-metal elemental analysis was performed using a Perkin Elmer Nexion 300 inductively coupled plasma mass spectrometer equipped with a quadrupole mass analyzer.

*TEM of the same carbon materials before and after oxidation:* TEM grids with labels were carefully mixed with CB powders and shaken for 3 min. The as-prepared TEM grids were then loaded into the TEM holder and a set of marked areas checked under TEM. Afterward, the grids along with the holder were treated with O<sub>2</sub> plasma for 15 s or treated with UV Ozone for 60 s to mimic the sample preparation process while avoiding destroying the grids. The same area was then checked under TEM again and compared with the images taken before the oxidizing treatments.

*Electrochemical Measurements:* Rotating disk electrode (RDE) and rotating ring-disk electrode (RRDE) tests were performed in an electrochemical cell. Rotating rate was controlled with a Pine

Instrument rotator (model: AFMSRCE). Typically, the catalyst (1.0 mg) and 5 wt% Nafion solution (80  $\mu$ L) were mixed in 1.60 mL ethanol and 6.40 mL water followed by 4 h bath sonication (Cole Parmer, model 08849–00) to obtain a homogeneous ink. 16.00  $\mu$ L as-prepared catalyst ink was loaded onto a RDE (glassy carbon, 5 mm in diameter) and dried in air at room temperature. RDE electrochemical tests were carried out using a CHI 608D electrochemical workstation (CH Instruments, Inc.) with a three-electrode configuration. A graphite rod and a HgO/Hg (1 M KOH) electrode are used as the counter electrode and reference electrode, respectively. The ORR tests were conducted in 0.1 M KOH solution with continuous O<sub>2</sub> bubbling to ensure the O<sub>2</sub> saturation. Controlled experiments in Ar atmosphere were done under the same conditions by replacing O<sub>2</sub> bubbling with Ar bubbling. RRDE tests were done by combining a CHI 608D electrochemical workstation (CH Instruments, Inc.) with a CS310 electrochemical workstation (Wuhan Corrtest Instruments Corp., Ltd.). The disk electrode was scanned at a rate of 10 mV/s and the ring potential was kept constant at (1.16  $\pm$  0.01) V vs RHE using a chronoamperometry method. The H<sub>2</sub>O<sub>2</sub> yield and electron transfer number were calculated using the following eq 1 and 2:

$$\text{H}_2\text{O}_2\% = \frac{I_r/N}{I_r/N + I_d} \times 200\% \quad (1)$$

$$n = 4 \times \frac{I_d}{I_r/N + I_d} \quad (2)$$

Where  $I_d$  is the disk current,  $I_r$  is the ring current and  $N$  is the collection efficiency (0.25).

Bulk electrolysis was conducted in an H-cell. Typically, 8.0 mg CB-Plasma and 5 wt% Nafion solution (80  $\mu$ L) were mixed in 8.00 mL solvent (water:ethanol = 4:1, v:v) and sonicated for 4 h (Cole Parmer, model 08849–00) to obtain a homogeneous ink. 0.50 mL as-prepared ink was then loaded onto a carbon paper electrode (0.5  $\times$  1 cm<sup>2</sup>, Toray Paper 060, Fuel Cell Store), which was left dry at room temperature overnight. H<sub>2</sub>O<sub>2</sub> concentration was quantified by a cerium sulfate titration method. The yellow Ce<sup>4+</sup> ion is reduced by H<sub>2</sub>O<sub>2</sub> to colorless Ce<sup>3+</sup> as in eq 3:

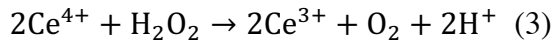

The amount of  $\text{H}_2\text{O}_2$  is then determined by measuring the amount changing of  $\text{Ce}^{4+}$  in eq 4:

$$n_{\text{H}_2\text{O}_2} = 2\Delta n_{\text{Ce}^{4+}} \quad (4)$$

*Computational Details:* Spin-polarized DFT calculations are implemented in Vienna *Ab Initio* Simulation Package (VASP).<sup>4,5</sup> The exchange-correlation potential is described by Perdew-Burke-Ernzerhof (PBE) functional with generalized gradient approximation (GGA).<sup>6</sup> The projector augmented wave (PAW) method is applied to describe the electron-ion interaction<sup>7,8</sup> and the plane-wave energy cutoff is 500 eV. The energy and forces convergence criterion are  $1 \times 10^{-5}$  eV and 0.01 eV/Å, respectively. The vacuum spacing is set to 18 Å along the non-periodic direction to prevent interaction between two neighboring surfaces. The van der Waals interaction is considered by DFT-D3 method proposed by Grimme *et al.*<sup>9</sup>

For each step along the ORR  $2e^-$  and  $4e^-$  pathways, the Gibbs free energy  $\Delta G$  is calculated using the computational hydrogen electrode (CHE) model developed by Norskov *et al.*<sup>10,11</sup> and defined as the difference between free energies of the initial and final states in eq 5:<sup>12,13</sup>

$$\Delta G = \Delta E + \Delta \text{ZPE} - T\Delta S + \Delta G_U \quad (5)$$

where  $\Delta E$  is the reaction energy obtained from DFT calculations;  $\Delta \text{ZPE}$  and  $\Delta S$  are the zero-point energy and entropy contribution estimated by harmonic approximations due to the reaction; The bias effect on the free energy is taken into account by shifting the energy of the state by  $\Delta G_U = -neU$ , where  $U$  is the electrode applied potential relative to RHE and  $n$  is the number of proton-electron pairs transferred in each step.

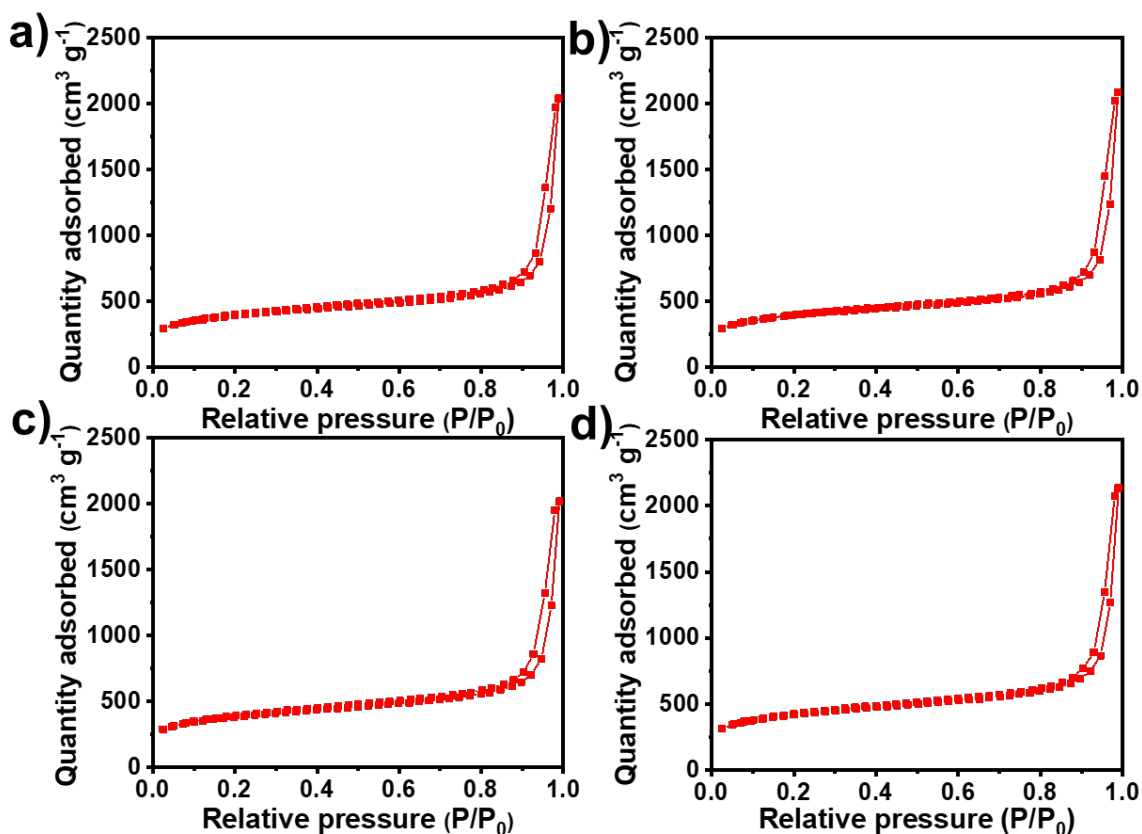

**Figure S1.** N<sub>2</sub> adsorption/desorption plots of (a) pristine CB, (b) CB-Plasma, (c) CB-UV, and (d) CB-A.

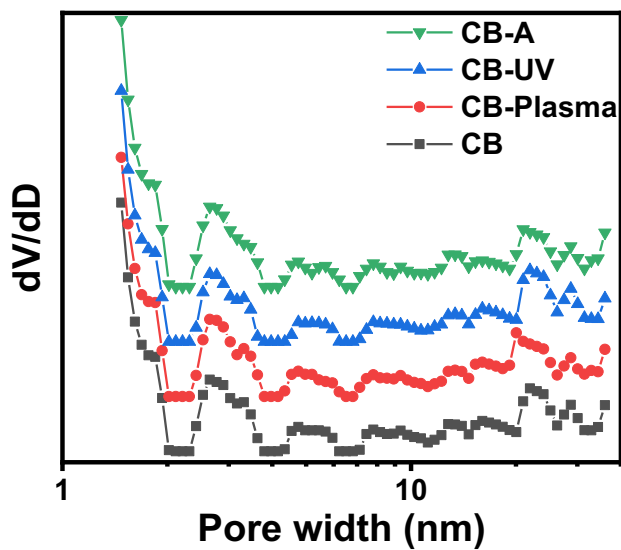

**Figure S2.** Pore size distributions of pristine CB, CB-Plasma, CB-UV, and CB-A.

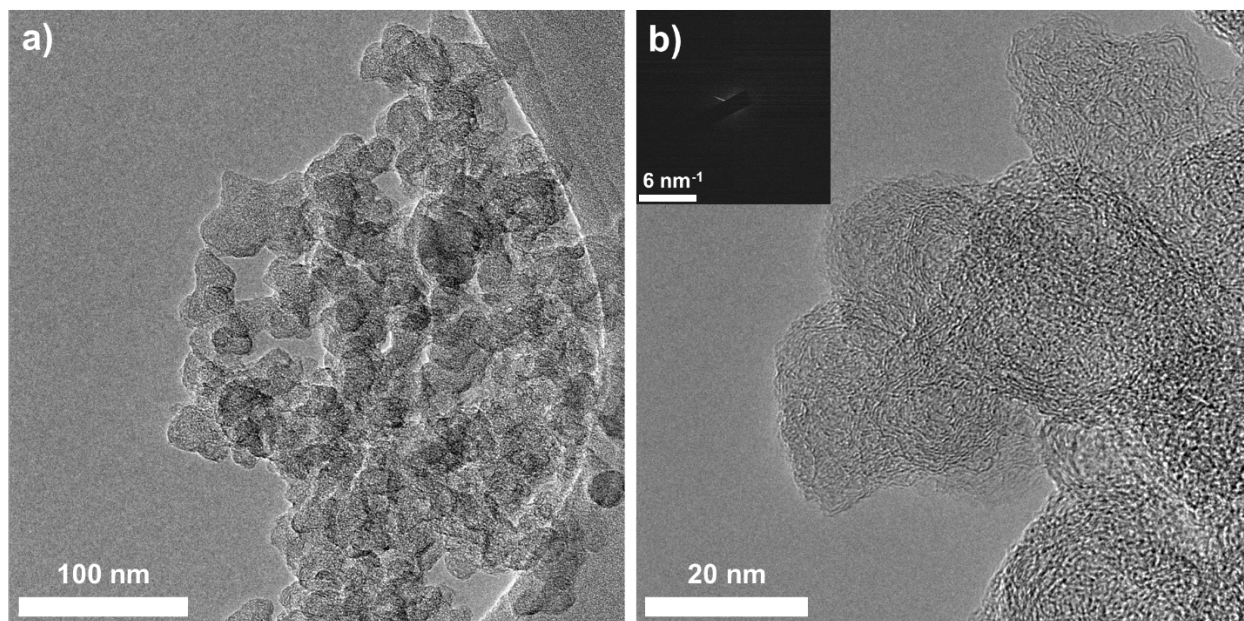

**Figure S3.** (a) TEM and (b) HR-TEM images of pristine CB. Inset: corresponding SAED pattern.

There were no obvious lattice fringes in the HR-TEM image and only blurred rings were found in the inset SAED pattern, both of which confirm the amorphous nature of pristine CB.

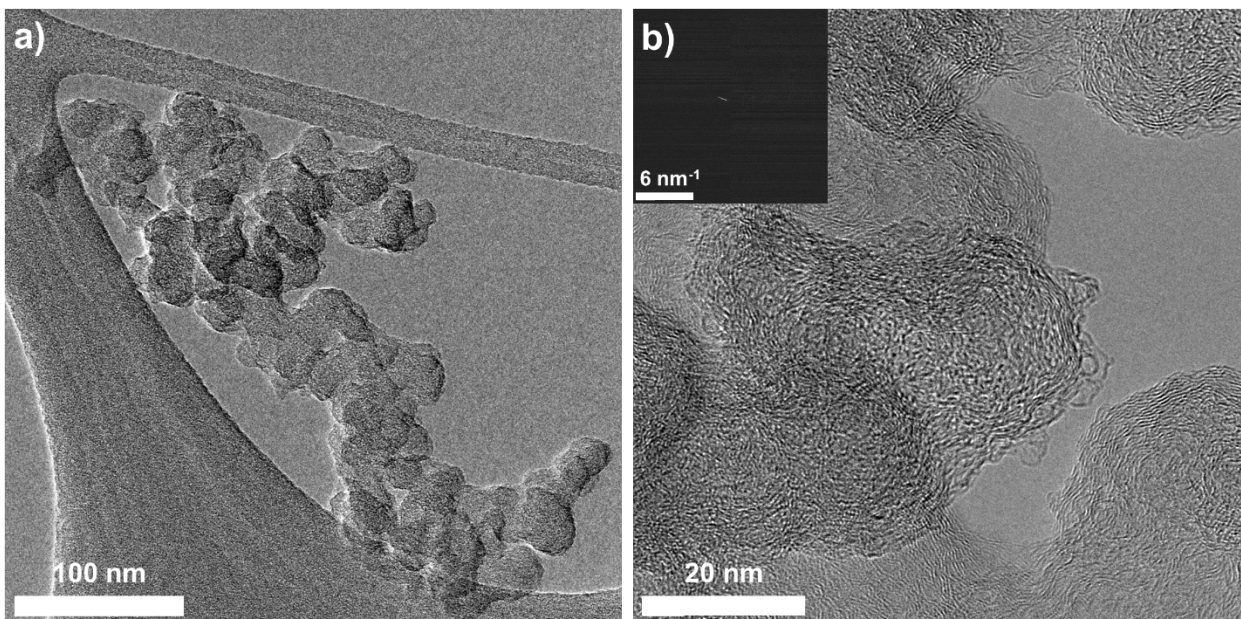

**Figure S4.** (a) TEM and (b) HR-TEM images of CB-Plasma. Inset: corresponding SAED pattern.

There were no obvious lattice fringes in the HR-TEM image and only blurred rings were found in the inset SAED pattern, both of which confirmed the amorphous nature was maintained after plasma treatment.

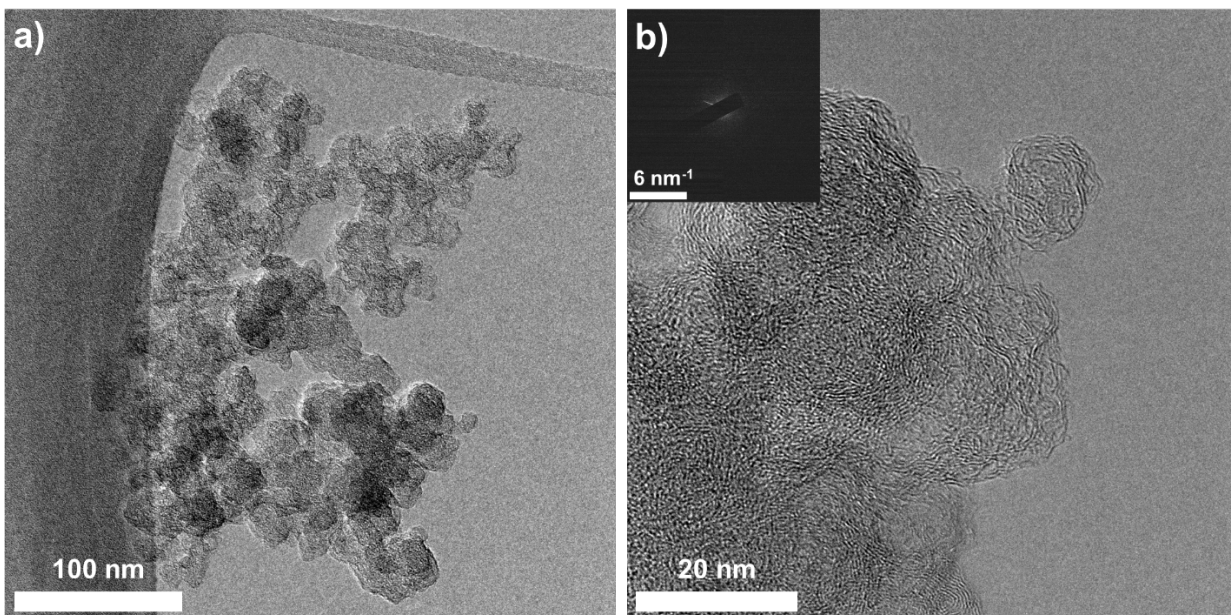

**Figure S5.** (a) TEM and (b) HR-TEM images of CB-UV. Inset: corresponding SAED pattern.

There were no obvious lattice fringes in the HR-TEM image and only blurred rings were found in the inset SAED pattern, both of which confirmed the amorphous nature was maintained after UV-ozone treatment.

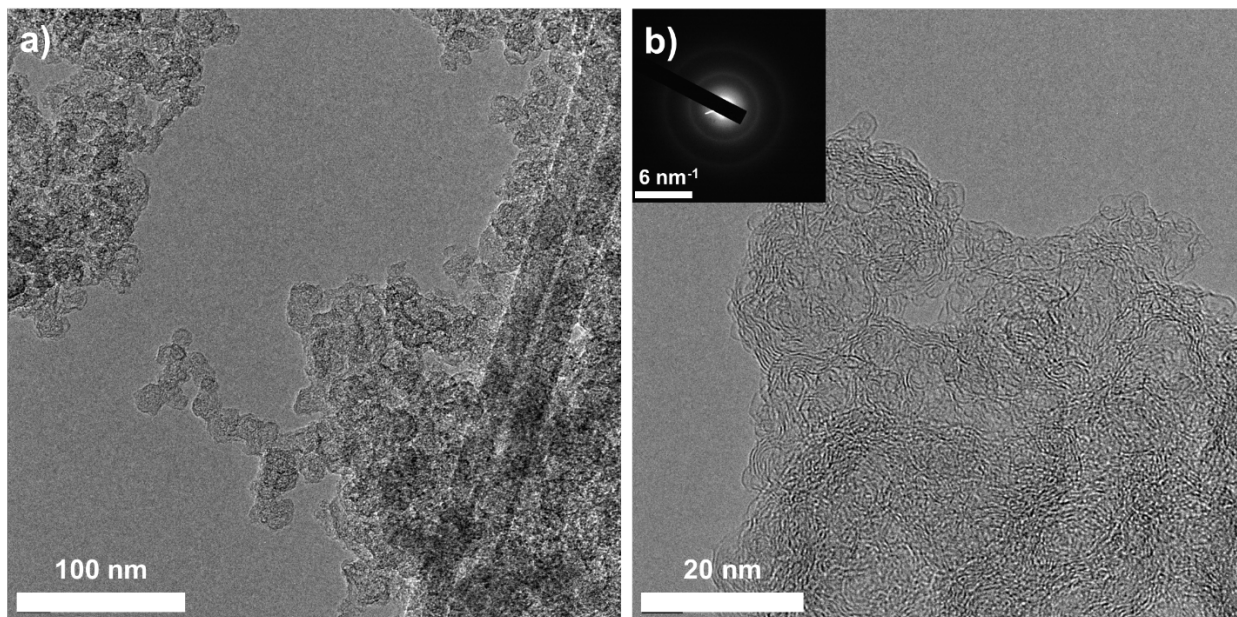

**Figure S6.** (a) TEM and (b) HR-TEM images of CB-A. Inset: corresponding SAED pattern. There were no obvious lattice fringes in the HR-TEM image and only blurred rings were found in the inset SAED pattern, both of which confirmed the amorphous nature was maintained after the high-temperature annealing process.

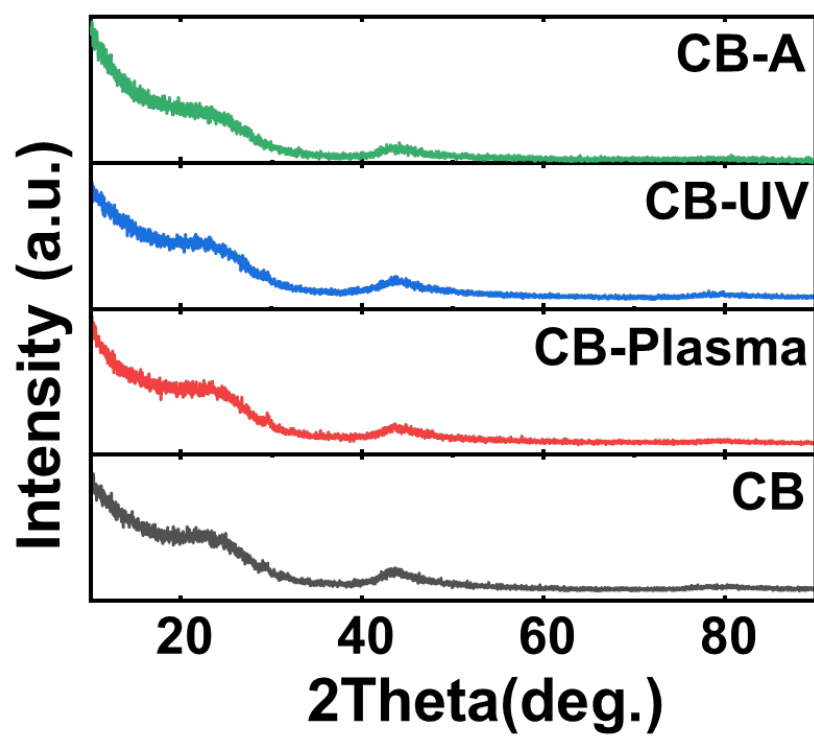

**Figure S7.** XRD patterns of CB-A, CB-UV, CB-Plasma, and CB-A. Only broad peaks were observed, confirming the amorphous nature of all the samples.

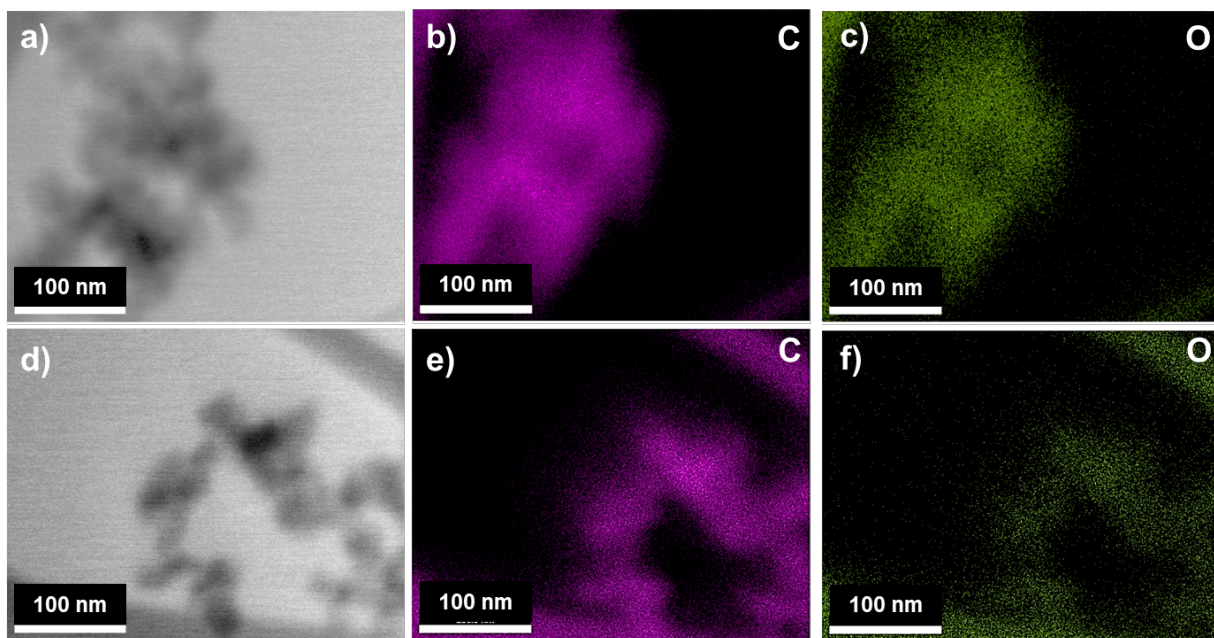

**Figure S8.** (a) STEM image of CB-UV on a lacey carbon TEM grid and (b-c) respective elemental distribution of C and O. Purple: carbon; green: oxygen. (d) STEM image of CB-Plasma on a lacey carbon TEM grid and (e-f) respective elemental distribution of C and O. Purple: carbon; green: oxygen. Oxygen is uniformly distributed in both samples.

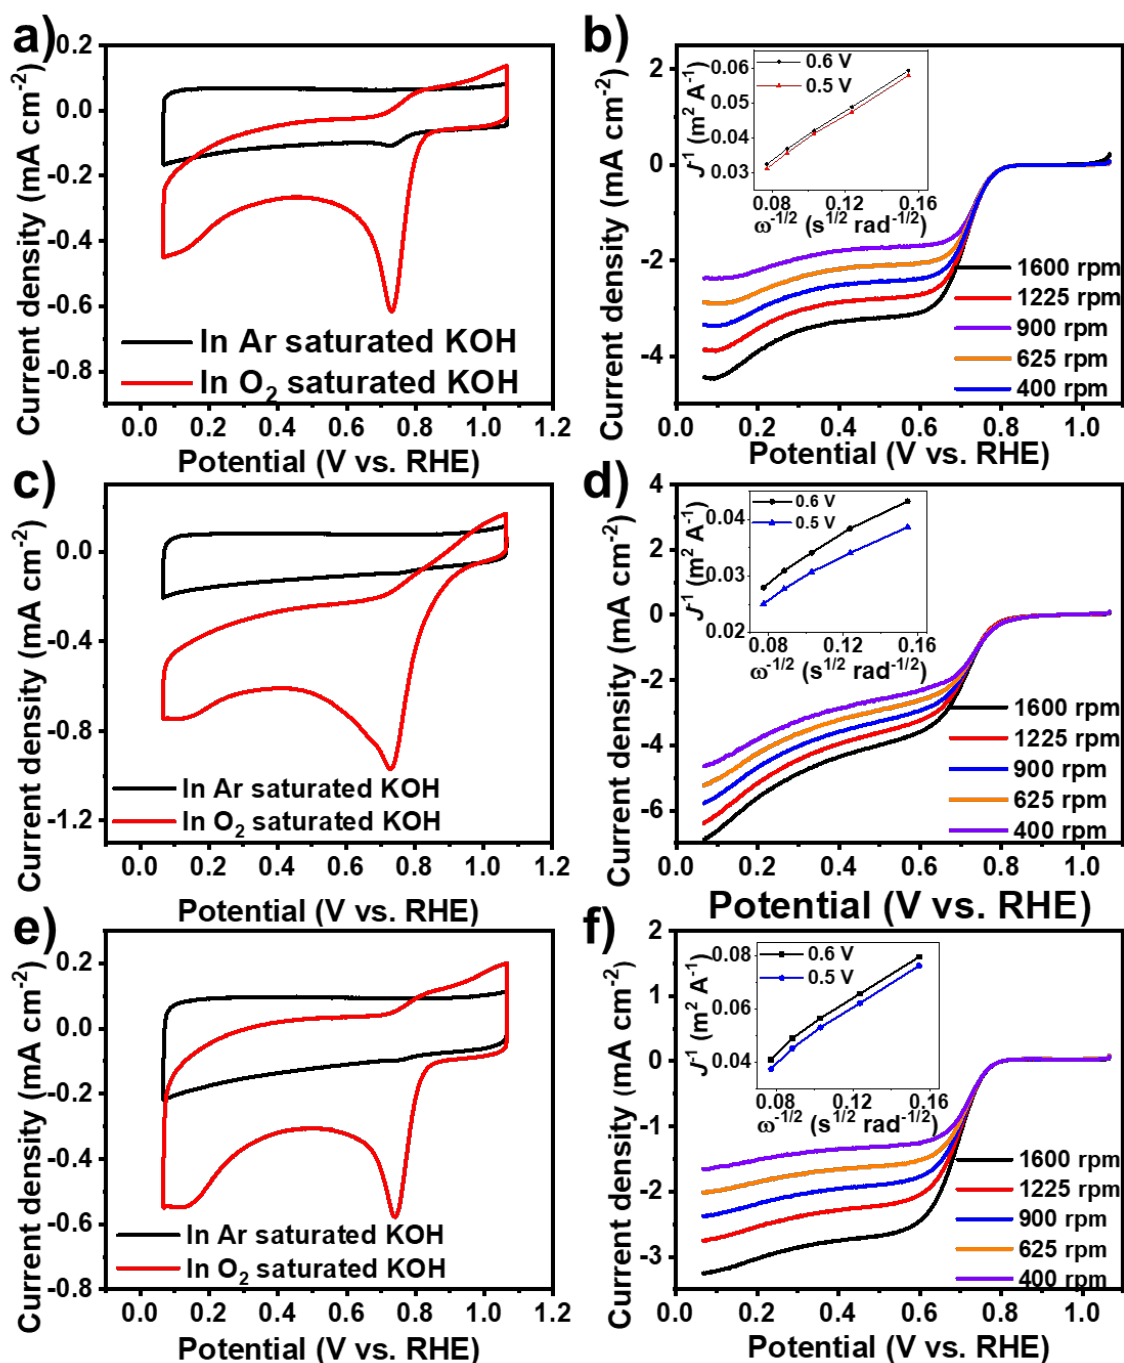

**Figure S9.** CV curves in Ar- and  $\text{O}_2$ -saturated 0.1 M KOH of (a) CB, (c) CB-UV, and (e) CB-A.

Scan rate:  $10 \text{ mV s}^{-1}$ . LSV curves at different rotating speeds ranging from 400 rpm to 1600 rpm of (b) CB, (d) CB-UV, and (f) CB-A. Insets: corresponding K-L plots at different potentials.

Calculated electron transfer numbers of CB, CB-UV, and CB-A are 2.3, 2.3, and 2.0, respectively.

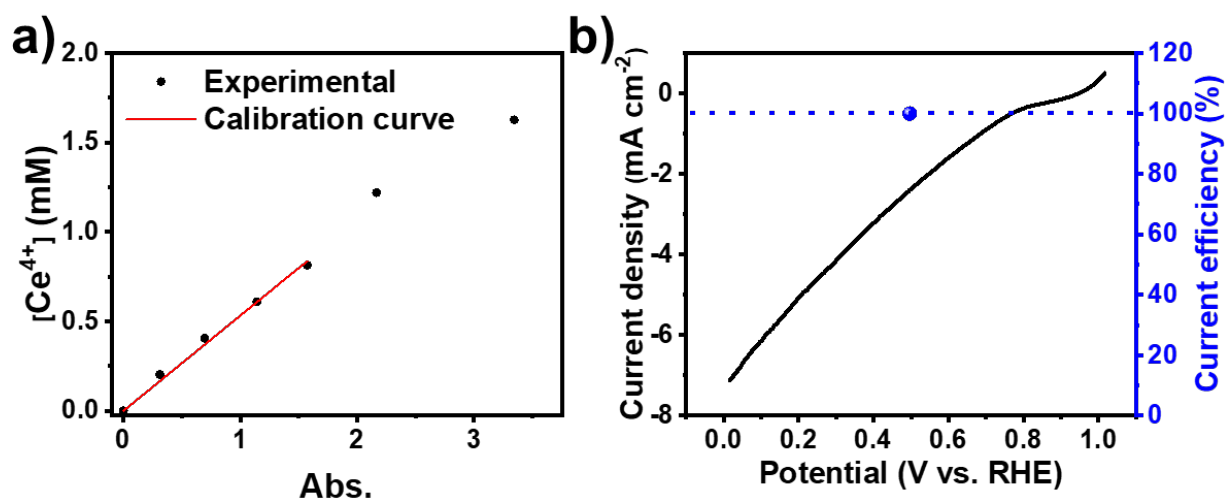

**Figure S10.** (a) Calibration curve of  $\text{Ce}^{4+}$  concentration and absorbance at 319 nm. (b) Polarization curve on carbon paper electrode in  $\text{O}_2$  saturated 0.1 M KOH electrolyte and calculated current efficiency of bulk electrolysis determined by  $\text{Ce}(\text{SO}_4)_2$  titration method.

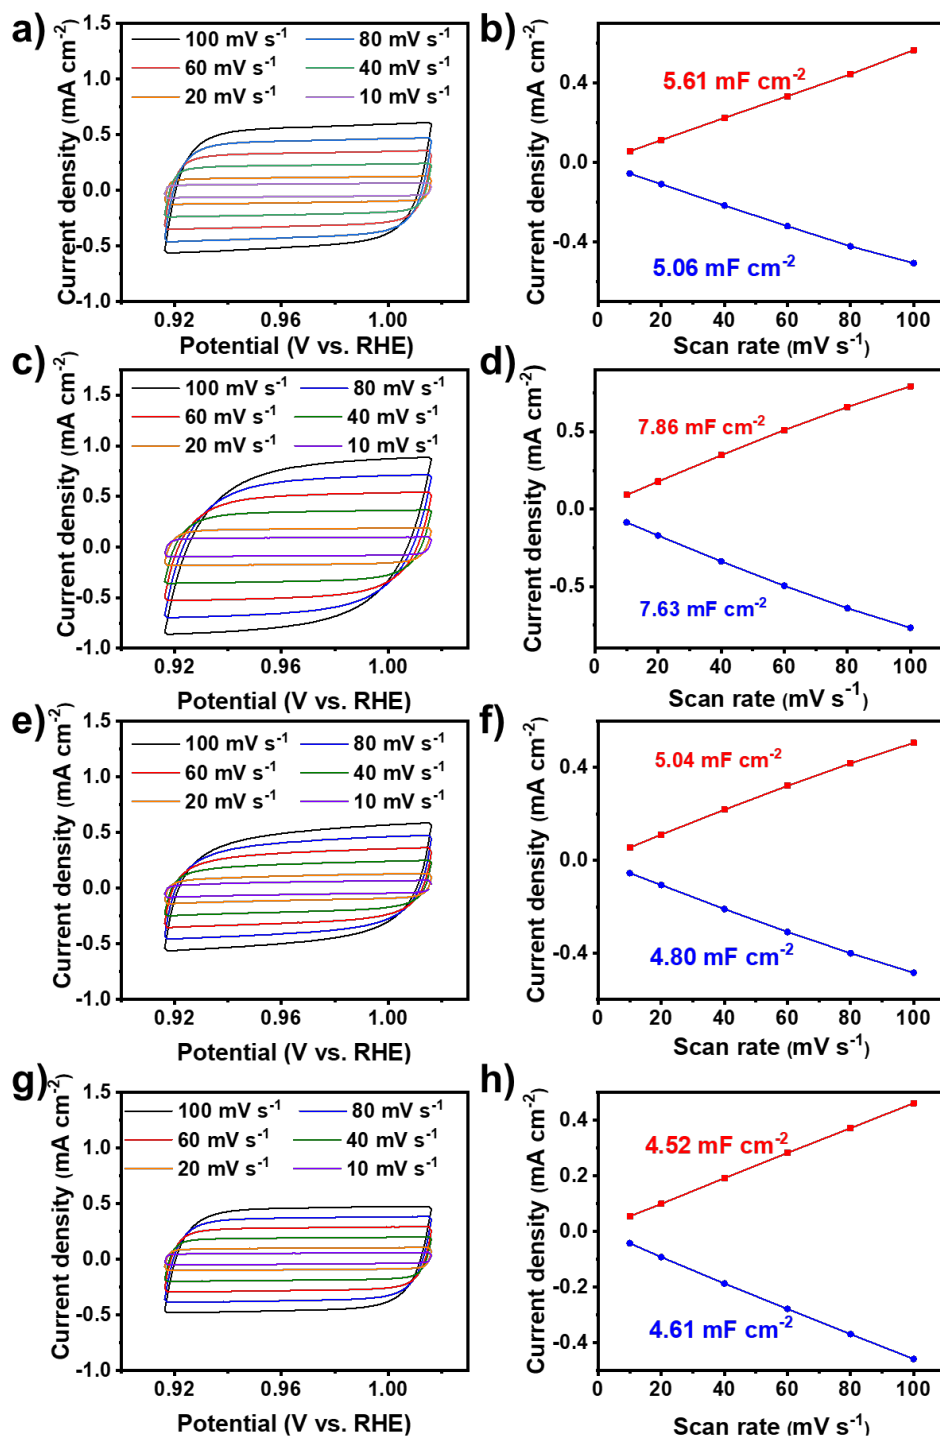

**Figure S11.** Determination of the  $C_{dl}$ . CV curves recorded at 10, 20, 40, 60, 80, 100  $\text{mV s}^{-1}$  of (a) CB, (c) CB-Plasma, (e) CB-UV, (g) CB-A. Current density at 0.96 V (vs. RHE) as a function of scan rate along with the linear fitting curves of (b) CB, (d) CB-Plasma, (f) CB-UV, (h) CB-A are shown.

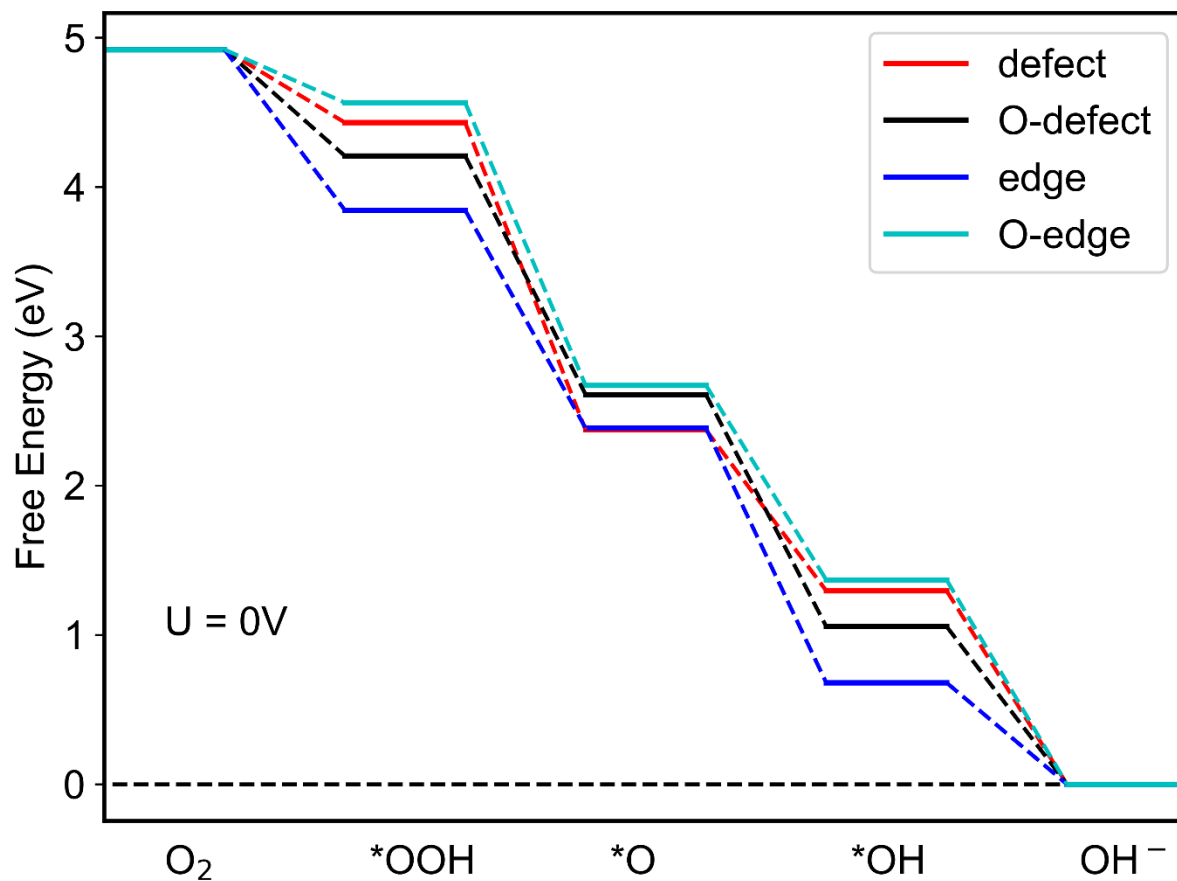

**Figure S12.** Free energy profile of  $4e^-$  pathway at  $U = 0$  V on four defect GNR models.

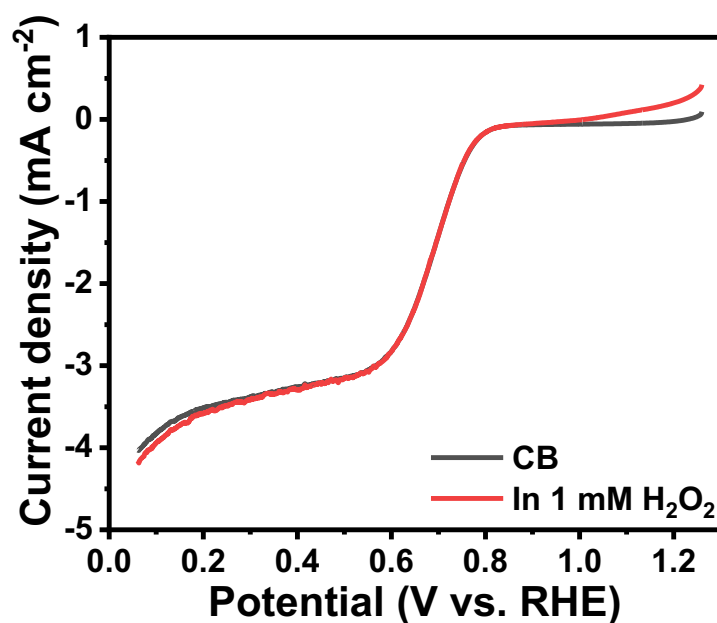

**Figure S13.** LSV curves of CB in O<sub>2</sub>-saturated 0.1 M KOH and O<sub>2</sub>-saturated 0.1 M KOH with 1 mM H<sub>2</sub>O<sub>2</sub> at a rotating speed of 1600 rpm. The current differences above 0.8 V and below 0.3 V are attributed to H<sub>2</sub>O<sub>2</sub> oxidation current and to H<sub>2</sub>O<sub>2</sub> reduction current, respectively. Scan rate: 20 mV s<sup>-1</sup>.

**Table S1.** Brunauer-Emmett-Teller (BET) Surface Analysis Results

| Sample    | Specific surface area (m <sup>2</sup> g <sup>-1</sup> ) | Pore Width (nm) |
|-----------|---------------------------------------------------------|-----------------|
| CB        | 1307                                                    | 1.47            |
| CB-UV     | 1312                                                    | 1.47            |
| CB-Plasma | 1281                                                    | 1.47            |
| CB-A      | 1392                                                    | 1.47            |

**Table S2.** Elemental Composition of CB, CB-Plasma, CB-UV, and CB-A from XPS

| Sample    | C (at%) | O (at%) |
|-----------|---------|---------|
| CB        | 99.2    | 0.8     |
| CB-Plasma | 76.5    | 23.5    |
| CB-UV     | 91.5    | 8.5     |
| CB-A      | 98.4    | 1.6     |

**Table S3.** Concentrations of Carbon Species from XPS in CB, CB-Plasma, CB-UV, and CB-A

| Sample    | C-C/C=C (at%) | C-O (at%) | C=O (at%) | O=C-O (at%) |
|-----------|---------------|-----------|-----------|-------------|
| CB        | 100.0         | <0.1      | <0.1      | <0.1        |
| CB-Plasma | 81.6          | 4.8       | 4.9       | 8.8         |
| CB-UV     | 88.4          | 4.8       | 2.9       | 3.9         |
| CB-A      | 100.0         | <0.1      | <0.1      | <0.1        |

**Table S4.** Concentrations of oxygen species from XPS in CB-Plasma, and CB-UV

| Sample    | C-O (at%) | C=O (at%) |
|-----------|-----------|-----------|
| CB-Plasma | 57.4      | 42.6      |
| CB-UV     | 56.7      | 43.3      |

**Table S5.**  $C_{dl}$  and corresponding ECSA of CB, CB-Plasma, CB-UV, and CB-A

| Sample    | $C_{dl}$ (mF cm <sup>-2</sup> ) | ECSA (cm <sup>2</sup> cm <sup>-2</sup> <sub>electrode</sub> ) |
|-----------|---------------------------------|---------------------------------------------------------------|
| CB        | 5.34                            | 133                                                           |
| CB-Plasma | 7.75                            | 194                                                           |
| CB-UV     | 4.92                            | 123                                                           |
| CB-A      | 4.57                            | 114                                                           |

## References

1. Zhang, C.; Sha, J.; Fei, H.; Liu, M.; Yazdi, S.; Zhang, J.; Zhong, Q.; Zou, X.; Zhao, N.; Yu, H.; Jiang, Z.; Ringe, E.; Yakobson, B. I.; Dong, J.; Chen, D.; Tour, J. M. Single-Atomic Ruthenium Catalytic Sites on Nitrogen-Doped Graphene for Oxygen Reduction Reaction in Acidic Medium. *ACS Nano* **2017**, *11*, 6930.
2. a) McCrory, C. C.; Jung, S.; Peters, J. C.; Jaramillo, T. F. Benchmarking Heterogeneous Electrocatalysts for the Oxygen Evolution Reaction. *J. Am. Chem. Soc.* **2013**, *135*, 16977; b) Zhang, J.; Ren, M.; Wang, L.; Li, Y.; Yakobson, B. I.; Tour, J. M. Oxidized Laser-Induced Graphene for Efficient Oxygen Electrocatalysis. *Adv. Mater.* **2018**, *30*, 1707319.
3. Guo, Y.; Yuan, P.; Zhang, J.; Hu, Y.; Amiin, I. S.; Wang, X.; Zhou, J.; Xia, H.; Song, Z.; Xu, Q.; Mu, S. Carbon Nanosheets Containing Discrete Co-N<sub>x</sub>-B<sub>y</sub>-C Active Sites for Efficient Oxygen Electrocatalysis and Rechargeable Zn–Air Batteries. *ACS Nano* **2018**, *12*, 1894-1901.

4. Kresse, G.; Furthmüller, J. Efficiency of *Ab-Initio* Total Energy Calculations for Metals and Semiconductors using a Plane-Wave Basis Set. *Comput. Mater. Sci.* **1996**, *6*, 15-50.
5. Kresse, G.; Furthmüller, J. Efficient Iterative Schemes for *Ab Initio* Total-Energy Calculations Using a Plane-Wave Basis Set. *Phys. Rev. B* **1996**, *54*, 11169.
6. Perdew, J. P.; Burke, K.; Ernzerhof, M. Generalized Gradient Approximation Made Simple. *Phys. Rev. Lett.* **1996**, *77*, 3865.
7. Blochl, P. E. Projector Augmented-Wave Method. *Phys. Rev. B* **1994**, *50*, 17953-17979.
8. Kresse, G.; Joubert, D. From Ultrasoft Pseudopotentials to the Projector Augmented-Wave Method. *Phys. Rev. B* **1999**, *59*, 1758.
9. Grimme, S.; Antony, J.; Ehrlich, S.; Krieg, H. A Consistent and Accurate *Ab Initio* Parametrization of Density Functional Dispersion Correction (DFT-D) for the 94 Elements H-Pu. *J. Chem. Phys.* **2010**, *132*, 154104.
10. Rossmeisl, J.; Logadottir, A.; Nørskov, J. K. Electrolysis of Water on (Oxidized) Metal Surfaces. *Chem. Phys.* **2005**, *319*, 178-184.
11. Nørskov, J. K.; Rossmeisl, J.; Logadottir, A.; Lindqvist, L.; Kitchin, J. R.; Bligaard, T.; Jonsson, H. Origin of the Overpotential for Oxygen Reduction at a Fuel-Cell Cathode. *J. Phys. Chem. B* **2004**, *108*, 17886-17892.
12. Xu, H.; Cheng, D.; Cao, D.; Zeng, X. C. A Universal Principle for a Rational Design of Single-Atom Electrocatalysts. *Nat. Catal.* **2018**, *1*, 339-348.
13. Liu, S.; Li, Z.; Wang, C.; Tao, W.; Huang, M.; Zuo, M.; Yang, Y.; Yang, K.; Zhang, L.; Chen, S.; Xu, P.; Chen, Q. Turning Main-Group Element Magnesium into a Highly Active Electrocatalyst for Oxygen Reduction Reaction. *Nat. Commun.* **2020**, *11*, 938.
